# Supplementary material for: Association of Early Antibiotic Exposure With Childhood Body Mass Index Trajectory Milestones
Source: PubMed Central journal article supplement (PMC8276083; doi:10.1001/jamanetworkopen.2021.16581), 2021-07-12

## Supplementary Online Content

Aris IM, Lin PID, Rifas-Shiman SL, et al. Association of early antibiotic exposure with childhood body mass index trajectory milestones. *JAMA Netw Open*. 2021;4(7):e2116581. doi:10.1001/jamanetworkopen.2021.16581

**eTable 1.** Age and Magnitude of BMI at Peak and Rebound According to Demographic and Clinical Characteristics (n = 183 444)

**eTable 2.** Associations of Exposure to Antibiotics at Less Than 48 Months With Age and Magnitude of BMI at Peak and Rebound, by Timing of Antibiotic Exposure Periods, After Excluding Data From 5 Network Partners With the Most Atypical Prescribing Rates (n = 180 390)

**eTable 3.** Associations of Antibiotic Exposure at 0-5 Months With Age and Magnitude of BMI at Peak, by Complex Chronic Condition Status

**eTable 4.** Associations of Antibiotic Exposure at 0-47 Months With Age at BMI Rebound, by Complex Chronic Condition Status

**eTable 5.** Associations of Antibiotic Exposure at 0-47 Months With Magnitude of BMI Rebound, by Complex Chronic Condition Status

**eFigure 1.** Scatterplot of Standardized Residuals

**eFigure 2.** Associations of Antibiotic Exposure at 0-5 Months With Age and Magnitude of BMI at Peak, After Excluding Data From 5 Network Partners With the Most Atypical Prescribing Rates

**eFigure 3.** Associations of Antibiotic Exposure at 0-47 Months With Age and Magnitude of BMI at Rebound, After Excluding Data From 5 Network Partners With the Most Atypical Prescribing Rates

This supplementary material has been provided by the authors to give readers additional information about their work.

**eTable 1.** Age and Magnitude of BMI at Peak and Rebound According to Demographic and Clinical Characteristics (n = 183 444)

|                                                               |                     | BMI peak     |                                | BMI rebound  |                                |
|---------------------------------------------------------------|---------------------|--------------|--------------------------------|--------------|--------------------------------|
|                                                               |                     | Age (months) | Magnitude (kg/m <sup>2</sup> ) | Age (months) | Magnitude (kg/m <sup>2</sup> ) |
|                                                               |                     | Mean (SD)    |                                |              |                                |
| <b>Child sex</b>                                              |                     |              |                                |              |                                |
|                                                               | Male                | 8.3 (2.0)    | 18.1 (1.5)                     | 54.5 (18.5)  | 15.8 (1.3)                     |
|                                                               | Female              | 8.5 (2.2)    | 17.6 (1.5)                     | 50.3 (19.1)  | 15.6 (1.3)                     |
| <b>Race/ethnicity</b>                                         |                     |              |                                |              |                                |
|                                                               | White, non-Hispanic | 8.5 (2.2)    | 17.7 (1.5)                     | 54.0 (18.7)  | 15.6 (1.2)                     |
|                                                               | Black, non-Hispanic | 8.2 (1.9)    | 18.0 (1.6)                     | 51.7 (18.5)  | 15.8 (1.3)                     |
|                                                               | Hispanic            | 8.4 (2.1)    | 17.9 (1.6)                     | 49.3 (19.7)  | 15.9 (1.4)                     |
|                                                               | Asian, non-Hispanic | 8.1 (2.0)    | 17.5 (1.5)                     | 53.9 (19.5)  | 15.3 (1.2)                     |
|                                                               | Other, non-Hispanic | 8.4 (2.1)    | 17.8 (1.6)                     | 52.4 (18.8)  | 15.7 (1.3)                     |
|                                                               | Unknown             | 8.3 (2.0)    | 17.7 (1.5)                     | 53.3 (19.0)  | 15.7 (1.3)                     |
| <b>Preterm</b>                                                |                     |              |                                |              |                                |
|                                                               | No                  | 8.3 (2.1)    | 17.8 (1.5)                     | 52.4 (18.9)  | 15.7 (1.3)                     |
|                                                               | Yes                 | 8.9 (2.4)    | 17.4 (1.6)                     | 53.6 (18.8)  | 15.4 (1.3)                     |
| <b>Asthma</b>                                                 |                     |              |                                |              |                                |
|                                                               | No                  | 8.4 (2.1)    | 17.8 (1.5)                     | 52.5 (18.9)  | 15.7 (1.3)                     |
|                                                               | Yes                 | 8.4 (2.1)    | 18.2 (1.6)                     | 52.3 (18.9)  | 16.0 (1.4)                     |
| <b>Complex chronic condition &lt;72 months</b>                |                     |              |                                |              |                                |
|                                                               | No                  | 8.2 (2.0)    | 17.8 (1.5)                     | 52.3 (18.9)  | 15.7 (1.3)                     |
|                                                               | Yes                 | 8.9 (2.7)    | 17.8 (1.6)                     | 53.4 (18.9)  | 15.6 (1.4)                     |
| <b>Systemic corticosteroids episodes 0-47 months</b>          |                     |              |                                |              |                                |
|                                                               | 0                   | 8.4 (2.1)    | 17.7 (1.5)                     | 52.3 (19.0)  | 15.7 (1.3)                     |
|                                                               | 1                   | 8.3 (2.0)    | 18.0 (1.5)                     | 52.9 (18.7)  | 15.8 (1.3)                     |
|                                                               | 2                   | 8.3 (2.0)    | 18.2 (1.6)                     | 53.3 (18.5)  | 15.9 (1.3)                     |
|                                                               | 3                   | 8.4 (2.2)    | 18.2 (1.6)                     | 53.0 (18.5)  | 16.0 (1.4)                     |
|                                                               | ≥4                  | 8.5 (2.3)    | 18.4 (1.7)                     | 52.1 (18.7)  | 16.1 (1.4)                     |
| <b>Episodes for presumed infectious illnesses 0-47 months</b> |                     |              |                                |              |                                |
|                                                               | 0                   | 8.5 (2.2)    | 17.7 (1.5)                     | 52.1 (18.6)  | 15.8 (1.3)                     |
|                                                               | 1                   | 8.3 (2.1)    | 17.7 (1.5)                     | 53.2 (18.5)  | 15.7 (1.3)                     |
|                                                               | 2                   | 8.3 (2.1)    | 17.7 (1.5)                     | 52.9 (18.9)  | 15.6 (1.3)                     |
|                                                               | 3                   | 8.3 (2.0)    | 17.7 (1.5)                     | 52.9 (18.6)  | 15.6 (1.3)                     |
|                                                               | ≥4                  | 8.4 (2.1)    | 17.8 (1.5)                     | 52.4 (19.0)  | 15.7 (1.3)                     |
| <b>Number of clinical encounters 0-47 months</b>              |                     |              |                                |              |                                |
|                                                               | 0                   | 8.5 (2.3)    | 17.8 (1.5)                     | 51.4 (18.5)  | 15.8 (1.3)                     |
|                                                               | 1                   | 8.4 (1.8)    | 17.9 (1.5)                     | 51.1 (18.8)  | 15.7 (1.4)                     |
|                                                               | 2                   | 8.3 (1.9)    | 17.7 (1.6)                     | 51.9 (18.9)  | 15.6 (1.4)                     |
|                                                               | 3                   | 8.5 (2.3)    | 17.4 (1.5)                     | 50.8 (18.7)  | 15.4 (1.3)                     |
|                                                               | ≥4                  | 8.4 (2.1)    | 17.8 (1.5)                     | 52.5 (18.9)  | 15.7 (1.3)                     |

**eTable 2.** Associations of Exposure to Antibiotics at Less Than 48 Months With Age and Magnitude of BMI at Peak and Rebound, by Timing of Antibiotic Exposure Periods, After Excluding Data From 5 Network Partners With the Most Atypical Prescribing Rates (n = 180 390)

|                                   | BMI peak                      |                                | BMI rebound          |                                |
|-----------------------------------|-------------------------------|--------------------------------|----------------------|--------------------------------|
|                                   | Age (months)                  | Magnitude (kg/m <sup>2</sup> ) | Age (months)         | Magnitude (kg/m <sup>2</sup> ) |
|                                   | <b>β (95% CI)<sup>a</sup></b> |                                |                      |                                |
| <b><i>Any, mo</i></b>             |                               |                                |                      |                                |
| 0–5 <sup>b</sup>                  | 0.04 (0.02, 0.07)             | 0.09 (0.07, 0.11)              | 0.28 (0.03, 0.59)    | 0.02 (0.00, 0.03)              |
| 6–11 <sup>b,c</sup>               | – <sup>d</sup>                | –                              | 0.00 (-0.20, 0.20)   | 0.03 (0.02, 0.04)              |
| 12–23 <sup>b,c</sup>              | –                             | –                              | -0.34 (-0.54, -0.19) | 0.03 (0.02, 0.04)              |
| 24–35 <sup>b,c</sup>              | –                             | –                              | -0.62 (-0.82, -0.42) | 0.01 (0.00, 0.02)              |
| 36–47 <sup>b,c</sup>              | –                             | –                              | -0.54 (-0.75, -0.33) | 0.01 (0.00, 0.02)              |
| 0–47 <sup>b</sup>                 | –                             | –                              | -0.59 (-0.80, -0.37) | 0.02 (0.01, 0.03)              |
| <b><i>Broad-spectrum, mo</i></b>  |                               |                                |                      |                                |
| 0–5 <sup>b</sup>                  | 0.06 (0.02, 0.10)             | 0.10 (0.07, 0.12)              | 0.12 (-0.25, 0.49)   | 0.02 (-0.01, 0.03)             |
| 6–11 <sup>b,c</sup>               | –                             | –                              | 0.23 (-0.01, 0.47)   | 0.03 (0.01, 0.04)              |
| 12–23 <sup>b,c</sup>              | –                             | –                              | -0.26 (-0.47, -0.05) | 0.03 (0.02, 0.04)              |
| 24–35 <sup>b,c</sup>              | –                             | –                              | -0.60 (-0.83, -0.37) | 0.02 (0.01, 0.03)              |
| 36–47 <sup>b,c</sup>              | –                             | –                              | -0.65 (-0.89, -0.41) | 0.02 (0.01, 0.03)              |
| 0–47 <sup>b</sup>                 | –                             | –                              | -0.46 (-0.64, -0.28) | 0.03 (0.02, 0.04)              |
| <b><i>Narrow-spectrum, mo</i></b> |                               |                                |                      |                                |
| 0–5 <sup>b</sup>                  | 0.03 (0.00, 0.06)             | 0.08 (0.06, 0.10)              | 0.29 (0.00, 0.58)    | 0.02 (0.00, 0.03)              |
| 6–11 <sup>b,c</sup>               | –                             | –                              | -0.05 (-0.26, 0.15)  | 0.03 (0.02, 0.04)              |
| 12–23 <sup>b,c</sup>              | –                             | –                              | -0.34 (-0.53, -0.15) | 0.02 (0.01, 0.03)              |
| 24–35 <sup>b,c</sup>              | –                             | –                              | -0.64 (-0.85, -0.43) | 0.01 (0.00, 0.02)              |
| 36–47 <sup>b,c</sup>              | –                             | –                              | -0.50 (-0.72, -0.28) | 0.01 (0.00, 0.02)              |
| 0–47 <sup>b</sup>                 | –                             | –                              | -0.64 (-0.83, -0.45) | 0.03 (0.02, 0.04)              |

<sup>a</sup> All associations were adjusted for child sex, race/ethnicity, preterm birth, asthma, infections, complex chronic conditions, corticosteroid episodes and clinical encounters.

<sup>b</sup> Covariates contemporaneous with the exposure periods (corticosteroids, infections and clinical encounters) were adjusted for age-specific antibiotic exposures.

<sup>c</sup> Additionally adjusted for previous antibiotics exposure periods.

<sup>d</sup> Associations with age and magnitude of BMI at peak were only assessed for antibiotic exposure at 0–5 months.

**eTable 3.** Associations of Antibiotic Exposure at 0-5 Months With Age and Magnitude of BMI at Peak, by Complex Chronic Condition Status

|                                        | Without complex chronic conditions (n=160,984) |                |                 | With complex chronic conditions (n=22,460) |                |                 |
|----------------------------------------|------------------------------------------------|----------------|-----------------|--------------------------------------------|----------------|-----------------|
|                                        | Any antibiotic                                 | Broad-spectrum | Narrow-spectrum | Any antibiotic                             | Broad-spectrum | Narrow-spectrum |
|                                        | $\beta$ (95% CI) <sup>a</sup>                  |                |                 | $\beta$ (95% CI) <sup>a</sup>              |                |                 |
| <b><i>Age of BMI at peak</i></b>       |                                                |                |                 |                                            |                |                 |
| No exposure                            | ref                                            | ref            | ref             | ref                                        | ref            | ref             |
| 1 episode                              | 0.04                                           | 0.02           | 0.06            | -0.02                                      | 0.11           | -0.22           |
|                                        | (0.01,0.07)                                    | (-0.02,0.07)   | (0.02,0.09)     | (-0.13,0.08)                               | (-0.02,0.23)   | (-0.35,-0.10)   |
| 2 episodes                             | 0.1                                            | 0.14           | 0.15            | -0.01                                      | 0.05           | -0.30           |
|                                        | (0.04,0.17)                                    | (0.01,0.26)    | (0.05,0.25)     | (-0.18,0.16)                               | (-0.18,0.27)   | (-0.57,-0.03)   |
| 3 episodes                             | 0.21                                           | 0.08           | -0.15           | 0.14                                       | 0.64           | 0.30            |
|                                        | (0.06,0.35)                                    | (-0.20,0.36)   | (-0.51,0.22)    | (-0.13,0.41)                               | (0.27,1.01)    | (-0.22,0.82)    |
| ≥4 episodes                            | 0.04                                           | 0.15           | -0.3            | 0.26                                       | 0.5            | 0.43            |
|                                        | (-0.22,0.31)                                   | (-0.45,0.76)   | (-1.40,0.81)    | (-0.10,0.61)                               | (-0.04,1.04)   | (-0.27,1.14)    |
| <b><i>Magnitude of BMI at peak</i></b> |                                                |                |                 |                                            |                |                 |
| No exposure                            | ref                                            | ref            | ref             | ref                                        | ref            | ref             |
| 1 episode                              | 0.05                                           | 0.08           | 0.04            | 0.15                                       | 0.1            | 0.17            |
|                                        | (0.03,0.08)                                    | (0.04,0.11)    | (0.02,0.07)     | (0.09,0.21)                                | (0.03,0.18)    | (0.10,0.24)     |
| 2 episodes                             | 0.06                                           | 0.03           | 0.09            | 0.13                                       | 0.17           | 0.20            |
|                                        | (0.01,0.11)                                    | (-0.07,0.12)   | (0.02,0.17)     | (0.03,0.23)                                | (0.04,0.30)    | (0.05,0.36)     |
| 3 episodes                             | 0.11                                           | 0.28           | 0.12            | 0.14                                       | -0.09          | 0.29            |
|                                        | (0.01,0.22)                                    | (0.07,0.49)    | (-0.15,0.39)    | (-0.02,0.29)                               | (-0.31,0.12)   | (-0.01,0.59)    |
| ≥4 episodes                            | 0.24                                           | -0.15          | 0.09            | 0.25                                       | 0.14           | 0.38            |
|                                        | (0.05,0.44)                                    | (-0.60,0.30)   | (-0.73,0.91)    | (0.04,0.45)                                | (-0.17,0.46)   | (-0.02,0.79)    |

<sup>a</sup> Adjusted for child sex, race/ethnicity, preterm birth, asthma, infections, corticosteroid episodes and clinical encounters at 0–5 months of age.

**eTable 4.** Associations of Antibiotic Exposure at 0–47 Months With Age at BMI Rebound, by Complex Chronic Condition Status

|                               | Without complex chronic conditions (n=160,984) <sup>a</sup> |                        |                         |                         |                         |                        | With complex chronic conditions (n=22,460) <sup>a</sup> |                        |                         |                         |                         |                        |
|-------------------------------|-------------------------------------------------------------|------------------------|-------------------------|-------------------------|-------------------------|------------------------|---------------------------------------------------------|------------------------|-------------------------|-------------------------|-------------------------|------------------------|
|                               | 0–5 mo <sup>b</sup>                                         | 6–11 mo <sup>b,c</sup> | 12–23 mo <sup>b,c</sup> | 24–35 mo <sup>b,c</sup> | 36–47 mo <sup>b,c</sup> | 0–47 mo <sup>b</sup>   | 0–5 mo <sup>b</sup>                                     | 6–11 mo <sup>b,c</sup> | 12–23 mo <sup>b,c</sup> | 24–35 mo <sup>b,c</sup> | 36–47 mo <sup>b,c</sup> | 0–47 mo <sup>b</sup>   |
| <b><u>Any</u></b>             |                                                             |                        |                         |                         |                         |                        |                                                         |                        |                         |                         |                         |                        |
| No exposure                   | ref                                                         | ref                    | ref                     | ref                     | ref                     | ref                    | ref                                                     | ref                    | ref                     | ref                     | ref                     | ref                    |
| 1 episode                     | 0.23<br>(-0.08,0.53)                                        | -0.19<br>(-0.44,0.06)  | -0.31<br>(-0.56,-0.07)  | -0.34<br>(-0.59,-0.10)  | -0.22<br>(-0.47,0.03)   | -0.13<br>(-0.42,0.16)  | 1.04<br>(0.31,1.76)                                     | 0.08<br>(-0.59,0.75)   | -0.45<br>(-1.12,0.22)   | -0.28<br>(-0.96,0.40)   | -0.25<br>(-0.94,0.44)   | -0.31<br>(-1.11,0.48)  |
| 2 episodes                    | 0.17<br>(-0.47,0.81)                                        | 0.15<br>(-0.22,0.52)   | -0.5<br>(-0.82,-0.17)   | -0.56<br>(-0.93,-0.20)  | -0.38<br>(-0.77,0.00)   | -0.27<br>(-0.59,0.05)  | 0.59<br>(-0.59,1.76)                                    | 0.51<br>(-0.44,1.47)   | 1.22<br>(0.35,2.09)     | 0.12<br>(-0.83,1.06)    | 0.00<br>(-1.01,1.00)    | -0.60<br>(-1.48,0.27)  |
| 3 episodes                    | 0.06<br>(-1.31,1.43)                                        | 0.6<br>(0.06,1.13)     | -0.1<br>(-0.52,0.33)    | -1.05<br>(-1.57,-0.53)  | -0.57<br>(-1.15,0.01)   | -0.52<br>(-0.88,-0.17) | 0.28<br>(-1.55,2.12)                                    | -0.01<br>(-1.39,1.37)  | 0.34<br>(-0.79,1.47)    | -0.29<br>(-1.60,1.02)   | 1.46<br>(0.03,2.89)     | -1.21<br>(-2.18,-0.23) |
| ≥4 episodes                   | 1.77<br>(-0.72,4.26)                                        | 0.38<br>(-0.25,1.01)   | -0.59<br>(-1.02,-0.16)  | -1.69<br>(-2.29,-1.09)  | -1.5<br>(-2.20,-0.79)   | -0.81<br>(-1.09,-0.52) | 1.69<br>(-0.73,4.11)                                    | 1.56<br>(-0.04,3.16)   | 0.49<br>(-0.59,1.57)    | -0.83<br>(-2.14,0.49)   | -0.75<br>(-2.20,0.70)   | 0.07<br>(-0.65,0.79)   |
| <b><u>Broad-spectrum</u></b>  |                                                             |                        |                         |                         |                         |                        |                                                         |                        |                         |                         |                         |                        |
| No exposure                   | ref                                                         | ref                    | ref                     | ref                     | ref                     | ref                    | ref                                                     | ref                    | ref                     | ref                     | ref                     | ref                    |
| 1 episode                     | 0.09<br>(-0.35,0.54)                                        | 0.09<br>(-0.22,0.40)   | -0.34<br>(-0.61,-0.07)  | -0.29<br>(-0.57,-0.01)  | -0.40<br>(-0.69,-0.10)  | -0.29<br>(-0.54,-0.05) | 0.15<br>(-0.72,1.02)                                    | -0.2<br>(-0.97,0.57)   | -0.02<br>(-0.73,0.70)   | -1.13<br>(-1.88,-0.37)  | -0.16<br>(-0.94,0.62)   | 0.03<br>(-0.66,0.72)   |
| 2 episodes                    | 0.26<br>(-0.92,1.44)                                        | 0.45<br>(-0.07,0.97)   | 0<br>(-0.41,0.41)       | -0.16<br>(-0.63,0.32)   | -0.32<br>(-0.86,0.21)   | -0.24<br>(-0.56,0.07)  | 0.88<br>(-0.67,2.43)                                    | 0.70<br>(-0.51,1.90)   | 1.03<br>(0.01,2.04)     | 0.46<br>(-0.71,1.63)    | -0.22<br>(-1.49,1.05)   | -0.32<br>(-1.17,0.53)  |
| 3 episodes                    | 1.34<br>(-1.33,4.01)                                        | 0.91<br>(0.15,1.68)    | -0.13<br>(-0.69,0.43)   | -0.91<br>(-1.66,-0.16)  | -0.29<br>(-1.16,0.58)   | -0.58<br>(-0.99,-0.18) | -0.79<br>(-3.32,1.73)                                   | 1.08<br>(-0.73,2.90)   | -0.70<br>(-2.12,0.72)   | -1.13<br>(-2.82,0.56)   | -0.19<br>(-2.04,1.66)   | -0.16<br>(-1.20,0.89)  |
| ≥4 episodes                   | 4.22<br>(-1.53,9.96)                                        | 0.39<br>(-0.54,1.31)   | -0.02<br>(-0.58,0.54)   | -1.45<br>(-2.32,-0.59)  | -0.90<br>(-1.96,0.17)   | -0.38<br>(-0.69,-0.08) | 2.53<br>(-1.18,6.23)                                    | 2.28<br>(0.06,4.49)    | 0.35<br>(-0.99,1.69)    | -2.14<br>(-3.79,-0.48)  | -0.18<br>(-2.08,1.72)   | -0.30<br>(-1.03,0.44)  |
| <b><u>Narrow-spectrum</u></b> |                                                             |                        |                         |                         |                         |                        |                                                         |                        |                         |                         |                         |                        |
| No exposure                   | ref                                                         | ref                    | ref                     | ref                     | ref                     | ref                    | ref                                                     | ref                    | ref                     | ref                     | ref                     | ref                    |
| 1 episode                     | 0.31<br>(-0.01,0.64)                                        | -0.17<br>(-0.41,0.08)  | -0.31<br>(-0.54,-0.08)  | -0.42<br>(-0.67,-0.18)  | -0.24<br>(-0.49,0.02)   | -0.27<br>(-0.52,-0.02) | 0.59<br>(-0.25,1.43)                                    | 0.17<br>(-0.52,0.87)   | 0.14<br>(-0.51,0.79)    | 0.26<br>(-0.44,0.97)    | -0.29<br>(-1.02,0.44)   | -0.39<br>(-1.06,0.27)  |
| 2 episodes                    | -0.12<br>(-1.07,0.83)                                       | 0.2<br>(-0.24,0.64)    | -0.62<br>(-0.98,-0.27)  | -1.01<br>(-1.45,-0.58)  | -0.50<br>(-0.98,-0.03)  | -0.40<br>(-0.69,-0.11) | 0.13<br>(-1.70,1.95)                                    | 0.27<br>(-1.00,1.54)   | 0.85<br>(-0.17,1.87)    | -0.25<br>(-1.44,0.93)   | 0.10<br>(-1.20,1.40)    | -1.48<br>(-2.28,-0.68) |
| 3 episodes                    | 1.99<br>(-1.44,5.43)                                        | -0.19<br>(-1.22,0.84)  | -0.39<br>(-1.00,0.21)   | -1.05<br>(-1.91,-0.19)  | -1.00<br>(-1.94,-0.07)  | -0.75<br>(-1.09,-0.41) | 3.46<br>(-0.09,7.02)                                    | 0.01<br>(-2.79,2.80)   | 1.91<br>(0.26,3.56)     | 1.85<br>(-0.38,4.08)    | 0.61<br>(-1.64,2.86)    | -1.28<br>(-2.24,-0.31) |
| ≥4 episodes                   | -1.29<br>(-11.77,9.19)                                      | 2.5<br>(-0.44,5.43)    | -0.87<br>(-1.91,0.17)   | -1.85<br>(-3.46,-0.24)  | -2.32<br>(-4.15,-0.49)  | -1.13<br>(-1.44,-0.82) | 0.84<br>(-3.98,5.65)                                    | 1.11<br>(-4.09,6.30)   | -1.24<br>(-3.77,1.29)   | -0.48<br>(-3.61,2.64)   | 1.51<br>(-1.95,4.97)    | 0.52<br>(-0.27,1.31)   |

<sup>a</sup> All associations were adjusted for child sex, race/ethnicity, preterm birth, asthma, infections, corticosteroid episodes and clinical encounters.

<sup>b</sup> Covariates contemporaneous with the exposure periods (corticosteroids, infections and clinical encounters) were adjusted for age-specific antibiotic exposures.

<sup>c</sup> Additionally adjusted for previous antibiotics exposure periods.

**eTable 5.** Associations of Antibiotic Exposure at 0–47 Months With Magnitude of BMI Rebound, by Complex Chronic Condition Status

|                               | Without complex chronic conditions (n=160,984) <sup>a</sup> |                        |                       |                         |                       |                        | With complex chronic conditions (n=22,460) <sup>a</sup> |                        |                       |                         |                        |                        |
|-------------------------------|-------------------------------------------------------------|------------------------|-----------------------|-------------------------|-----------------------|------------------------|---------------------------------------------------------|------------------------|-----------------------|-------------------------|------------------------|------------------------|
|                               | 0–5 mo <sup>b</sup>                                         | 6–11 mo <sup>b,c</sup> | 12–23 mo <sup>b</sup> | 24–35 mo <sup>b,c</sup> | 36–47 mo <sup>b</sup> | 0–47 mo <sup>b,c</sup> | 0–5 mo <sup>b</sup>                                     | 6–11 mo <sup>b,c</sup> | 12–23 mo <sup>b</sup> | 24–35 mo <sup>b,c</sup> | 36–47 mo <sup>b</sup>  | 0–47 mo <sup>b,c</sup> |
| <b><u>Any</u></b>             |                                                             |                        |                       |                         |                       |                        |                                                         |                        |                       |                         |                        |                        |
| No exposure                   | ref                                                         | ref                    | ref                   | ref                     | ref                   | ref                    | ref                                                     | ref                    | Ref                   | ref                     | ref                    | ref                    |
| 1 episode                     | 0.02<br>(0.00,0.03)                                         | 0.03<br>(0.02,0.04)    | 0.03<br>(0.02,0.04)   | 0.01<br>(-0.00,0.02)    | 0.01<br>(-0.01,0.02)  | -0.01<br>(-0.02,0.01)  | -0.03<br>(-0.06,0.01)                                   | 0.01<br>(-0.02,0.04)   | -0.02<br>(-0.09,0.05) | 0.00<br>(-0.04,0.03)    | 0.03<br>(-0.01,0.06)   | -0.01<br>(-0.05,0.03)  |
| 2 episodes                    | 0.02<br>(-0.01,0.05)                                        | 0.03<br>(0.02,0.05)    | 0.04<br>(0.02,0.05)   | 0.02<br>(0.00,0.04)     | 0.02<br>(-0.00,0.04)  | 0.01<br>(-0.01,0.03)   | 0<br>(-0.06,0.06)                                       | 0.01<br>(-0.03,0.06)   | 0<br>(-0.08,0.09)     | 0.00<br>(-0.05,0.04)    | 0.02<br>(-0.03,0.07)   | 0.02<br>(-0.03,0.06)   |
| 3 episodes                    | 0.03<br>(-0.03,0.10)                                        | 0.03<br>(0.01,0.06)    | 0.04<br>(0.02,0.06)   | 0.03<br>(0.00,0.05)     | 0.02<br>(-0.01,0.04)  | 0.03<br>(0.02,0.05)    | -0.02<br>(-0.11,0.08)                                   | 0.04<br>(-0.03,0.11)   | -0.01<br>(-0.12,0.10) | 0.05<br>(-0.01,0.12)    | -0.09<br>(-0.16,-0.02) | 0.05<br>(-0.00,0.10)   |
| ≥4 episodes                   | -0.1<br>(-0.22,0.02)                                        | 0.06<br>(0.03,0.09)    | 0.06<br>(0.04,0.08)   | 0.02<br>(-0.01,0.05)    | 0.04<br>(0.01,0.07)   | 0.05<br>(0.04,0.07)    | -0.19<br>(-0.31,-0.07)                                  | -0.03<br>(-0.11,0.05)  | -0.02<br>(-0.14,0.09) | -0.01<br>(-0.08,0.06)   | 0.00<br>(-0.07,0.07)   | 0.00<br>(-0.04,0.03)   |
| <b><u>Broad-spectrum</u></b>  |                                                             |                        |                       |                         |                       |                        |                                                         |                        |                       |                         |                        |                        |
| No exposure                   | ref                                                         | ref                    | ref                   | ref                     | ref                   | ref                    | ref                                                     | ref                    | ref                   | ref                     | ref                    | ref                    |
| 1 episode                     | 0.02<br>(-0.00,0.04)                                        | 0.02<br>(0.01,0.04)    | 0.02<br>(0.01,0.04)   | 0.02<br>(0.01,0.03)     | 0.03<br>(0.02,0.04)   | 0.02<br>(0.01,0.03)    | 0.03<br>(-0.01,0.08)                                    | 0.01<br>(-0.03,0.05)   | 0.01<br>(-0.02,0.05)  | 0.03<br>(-0.00,0.07)    | 0.01<br>(-0.03,0.05)   | -0.01<br>(-0.04,0.03)  |
| 2 episodes                    | -0.01<br>(-0.07,0.04)                                       | 0.04<br>(0.01,0.06)    | 0.04<br>(0.02,0.06)   | 0.00<br>(-0.03,0.02)    | 0.00<br>(-0.02,0.03)  | 0.03<br>(0.02,0.05)    | -0.02<br>(-0.10,0.06)                                   | 0.01<br>(-0.05,0.07)   | -0.01<br>(-0.06,0.04) | 0.02<br>(-0.04,0.08)    | 0.02<br>(-0.04,0.09)   | 0.02<br>(-0.02,0.06)   |
| 3 episodes                    | -0.06<br>(-0.19,0.07)                                       | 0.01<br>(-0.02,0.05)   | 0.02<br>(-0.00,0.05)  | 0.05<br>(0.01,0.08)     | 0.03<br>(-0.01,0.07)  | 0.04<br>(0.02,0.06)    | -0.02<br>(-0.15,0.11)                                   | -0.07<br>(-0.16,0.02)  | 0.06<br>(-0.02,0.13)  | 0.07<br>(-0.01,0.16)    | -0.08<br>(-0.17,0.02)  | 0.01<br>(-0.04,0.06)   |
| ≥4 episodes                   | -0.14<br>(-0.42,0.13)                                       | 0.05<br>(0.00,0.09)    | 0.05<br>(0.03,0.08)   | 0.03<br>(-0.01,0.07)    | 0.03<br>(-0.02,0.08)  | 0.06<br>(0.04,0.07)    | -0.15<br>(-0.34,0.04)                                   | -0.08<br>(-0.19,0.04)  | 0.05<br>(-0.02,0.12)  | 0.01<br>(-0.08,0.09)    | -0.04<br>(-0.13,0.06)  | 0.01<br>(-0.03,0.05)   |
| <b><u>Narrow-spectrum</u></b> |                                                             |                        |                       |                         |                       |                        |                                                         |                        |                       |                         |                        |                        |
| No exposure                   | ref                                                         | ref                    | ref                   | ref                     | ref                   | ref                    | ref                                                     | ref                    | ref                   | ref                     | ref                    | ref                    |
| 1 episode                     | 0.02<br>(0.01,0.04)                                         | 0.03<br>(0.02,0.04)    | 0.03<br>(0.02,0.04)   | 0.01<br>(-0.01,0.02)    | 0.01<br>(-0.01,0.02)  | 0.01<br>(-0.00,0.02)   | -0.02<br>(-0.07,0.02)                                   | 0.02<br>(-0.02,0.05)   | 0.01<br>(-0.02,0.04)  | 0.00<br>(-0.04,0.03)    | 0.01<br>(-0.03,0.05)   | 0.04<br>(0.00,0.07)    |
| 2 episodes                    | 0.03<br>(-0.02,0.08)                                        | 0.02<br>(-0.00,0.04)   | 0.03<br>(0.01,0.05)   | 0.01<br>(-0.01,0.03)    | 0.00<br>(-0.02,0.02)  | 0.03<br>(0.01,0.04)    | -0.02<br>(-0.11,0.08)                                   | 0.04<br>(-0.03,0.10)   | -0.01<br>(-0.06,0.04) | 0.00<br>(-0.06,0.06)    | 0.03<br>(-0.04,0.09)   | 0.07<br>(0.02,0.11)    |
| 3 episodes                    | -0.1<br>(-0.26,0.07)                                        | 0.06<br>(0.01,0.11)    | 0.03<br>(0.00,0.06)   | 0.02<br>(-0.02,0.06)    | 0.01<br>(-0.03,0.06)  | 0.05<br>(0.03,0.06)    | -0.16<br>(-0.34,0.02)                                   | 0.04<br>(-0.10,0.19)   | -0.08<br>(-0.17,0.00) | -0.06<br>(-0.17,0.05)   | -0.04<br>(-0.16,0.07)  | 0.06<br>(0.01,0.11)    |
| ≥4 episodes                   | -0.24<br>(-0.74,0.26)                                       | -0.01<br>(-0.15,0.13)  | 0.04<br>(-0.01,0.09)  | 0.01<br>(-0.07,0.09)    | 0.05<br>(-0.04,0.14)  | 0.05<br>(0.04,0.07)    | -0.3<br>(-0.55,-0.06)                                   | -0.04<br>(-0.30,0.23)  | 0.07<br>(-0.06,0.19)  | -0.12<br>(-0.28,0.04)   | 0.01<br>(-0.16,0.19)   | -0.01<br>(-0.05,0.03)  |

<sup>a</sup> All associations were adjusted for child sex, race/ethnicity, preterm birth, asthma, infections, corticosteroid episodes and clinical encounters at 0–47 months of age.

<sup>b</sup> Covariates contemporaneous with the exposure periods (corticosteroids, infections and clinical encounters) were adjusted for age-specific antibiotic exposures.

<sup>c</sup> Additionally adjusted for previous antibiotics exposure periods.

eFigure 1. Scatterplot of Standardized Residuals

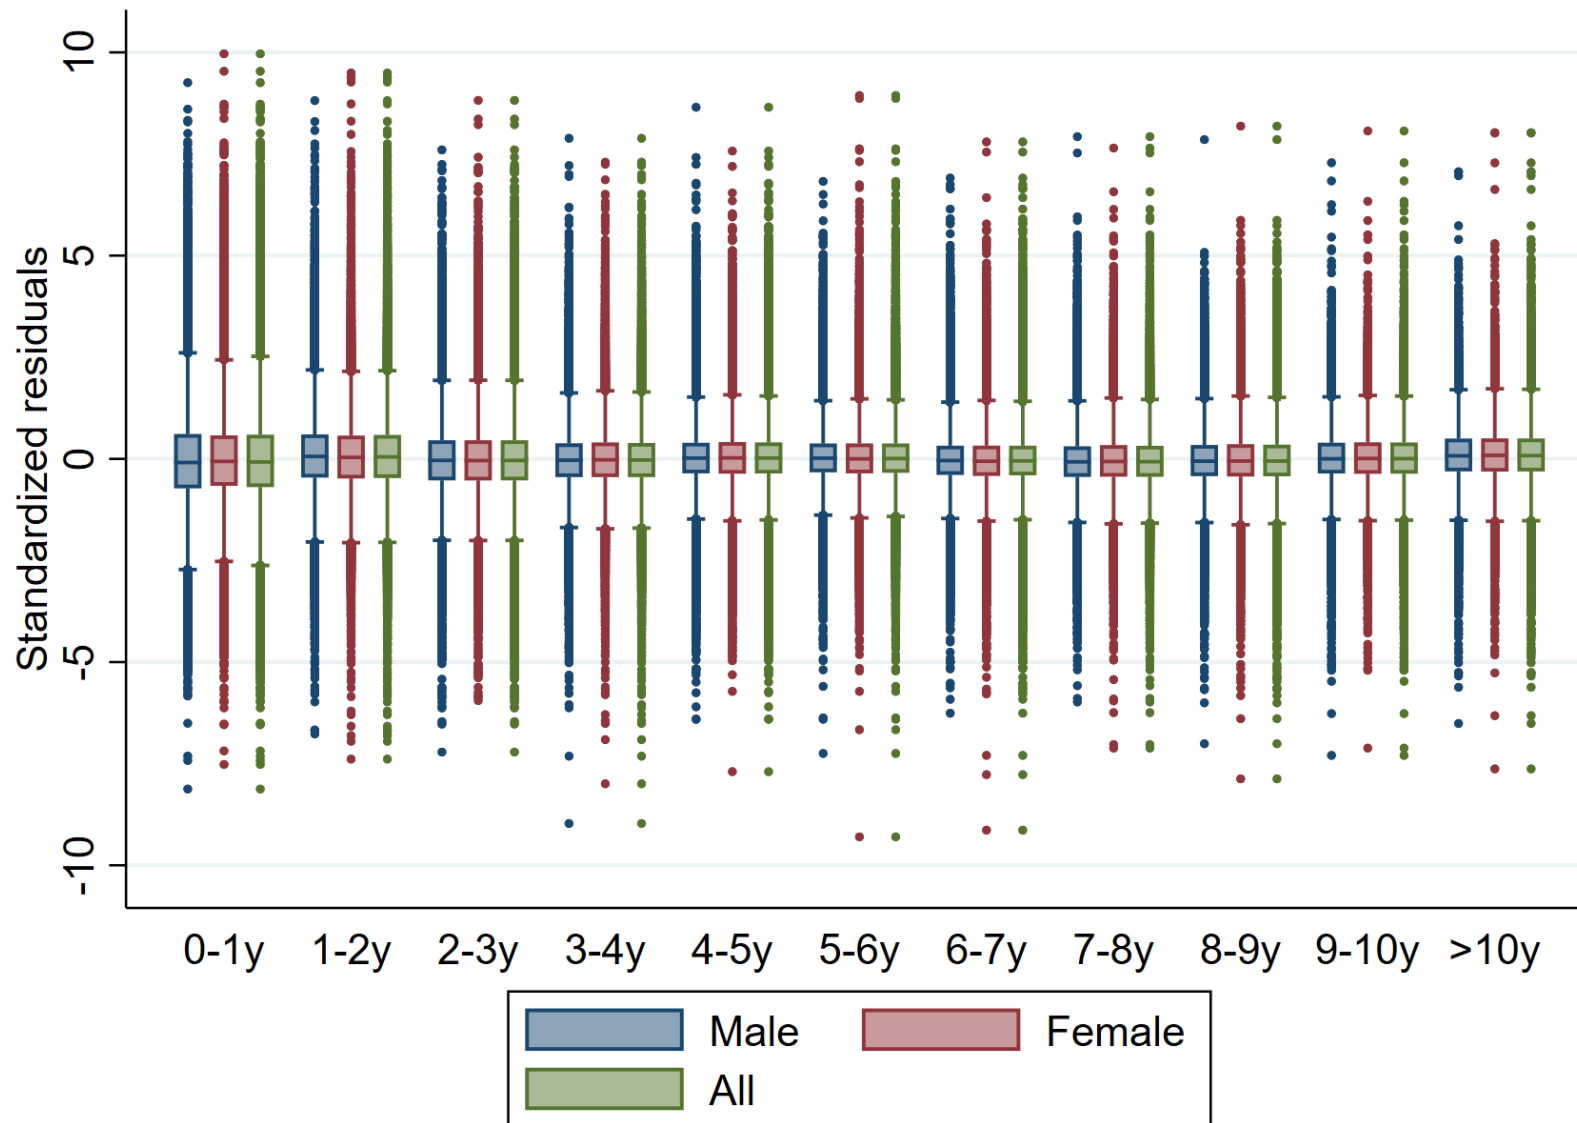

**eFigure 2.** Associations of Antibiotic Exposure at 0-5 Months With Age and Magnitude of BMI at Peak, After Excluding Data From 5 Network Partners With the Most Atypical Prescribing Rates

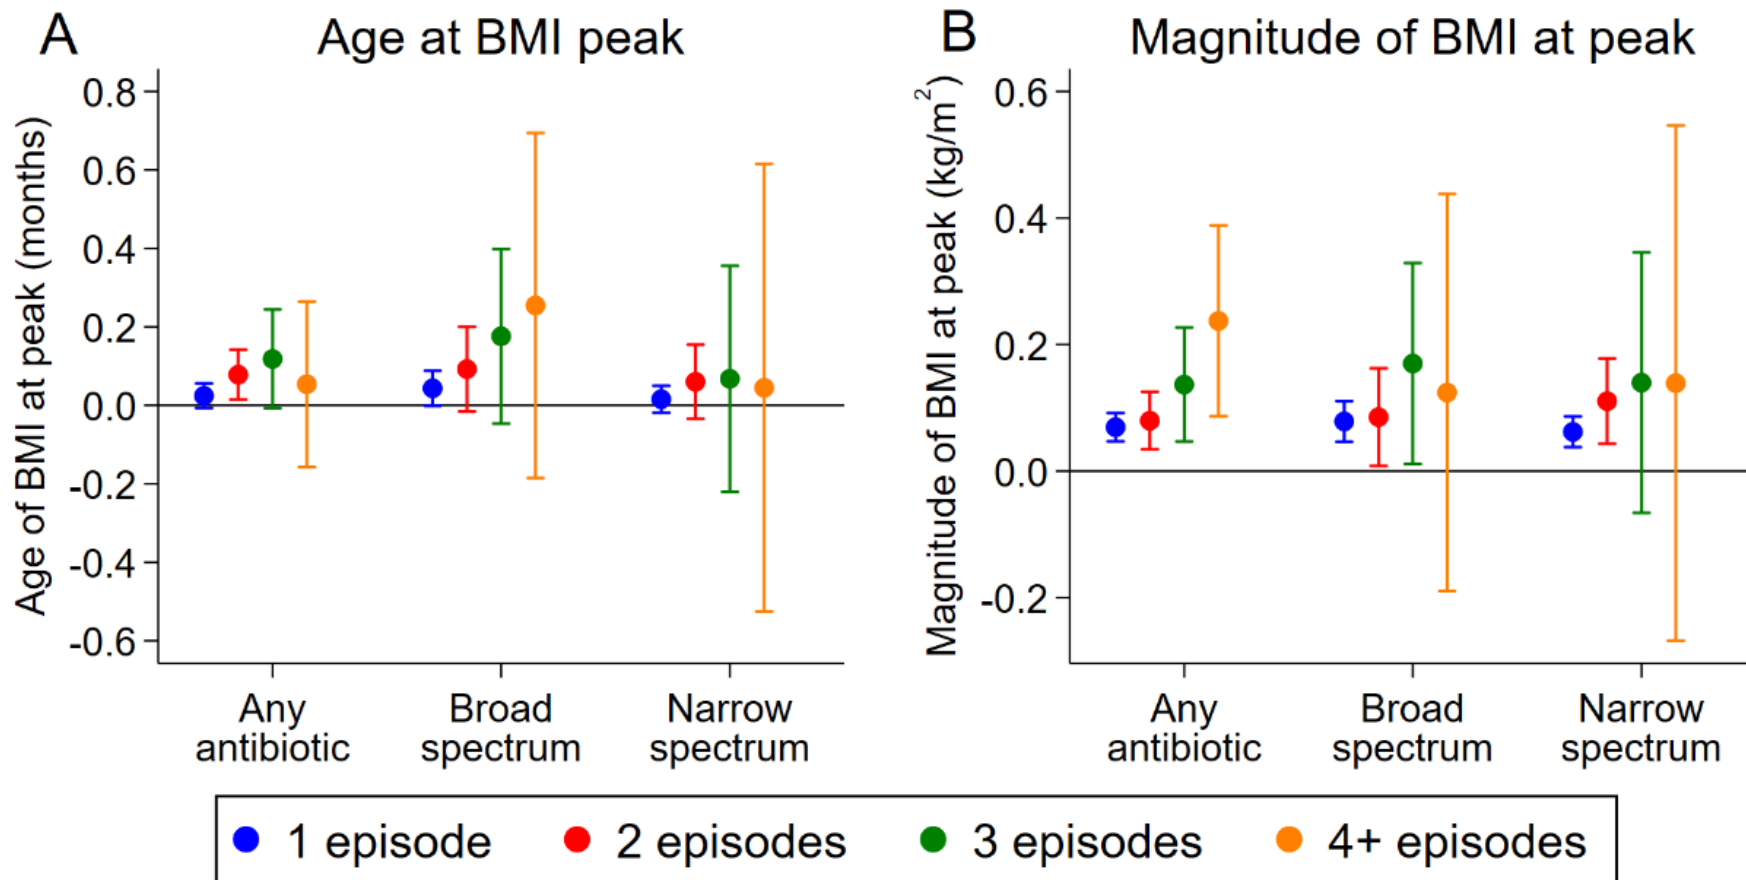



**eFigure 3.** Associations of Antibiotic Exposure at 0-47 Months With Age and Magnitude of BMI at Rebound, After Excluding Data From 5 Network Partners With the Most Atypical Prescribing Rates

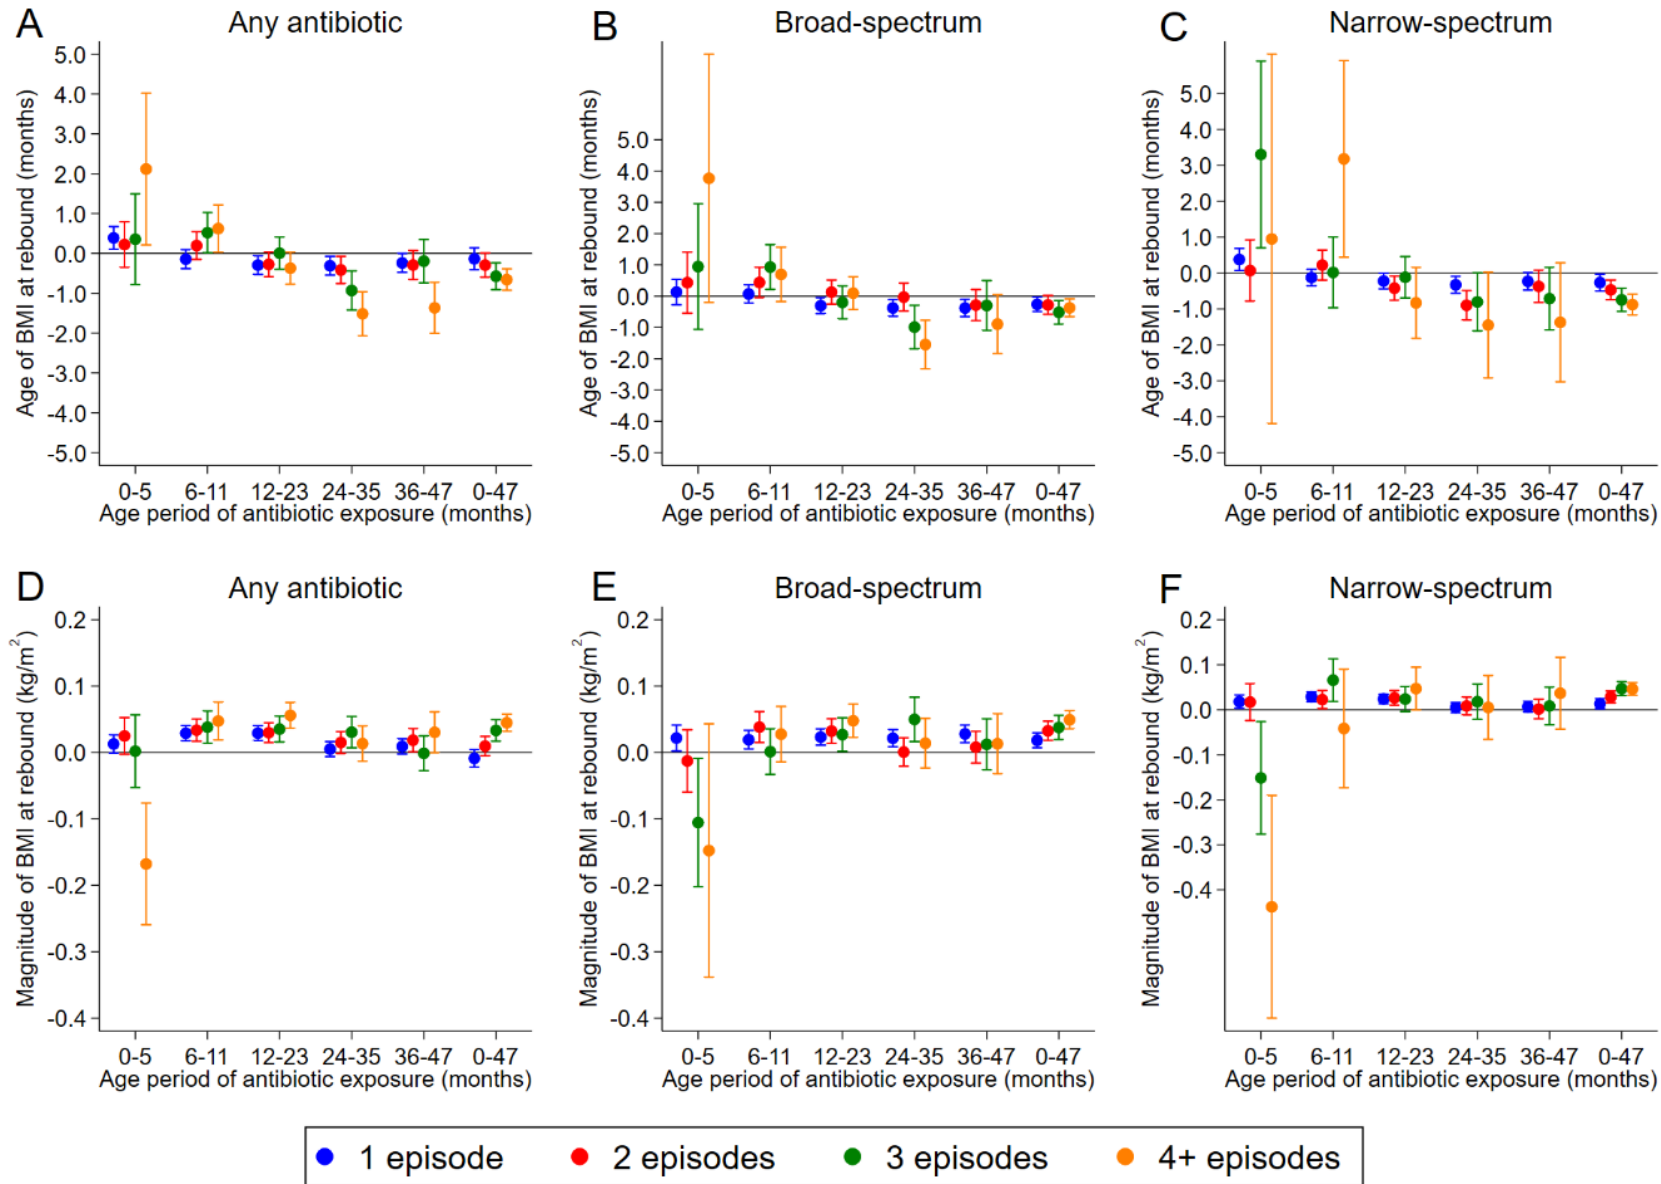

Supplement: jamanetwopen-e2116581-s001.pdf [file jamanetwopen-e2116581-s001.pdf]
